# Supplementary material
Source: Springer Nature journal article supplement (https://www.springermedizin.de/resource/supplementary/12987_2007_291_MOESM5_ESM.pdf/9611698)
Supplement: MOESM5 [file 9611698]

# CEREBROSPINAL FLUID

*(apical membrane)*

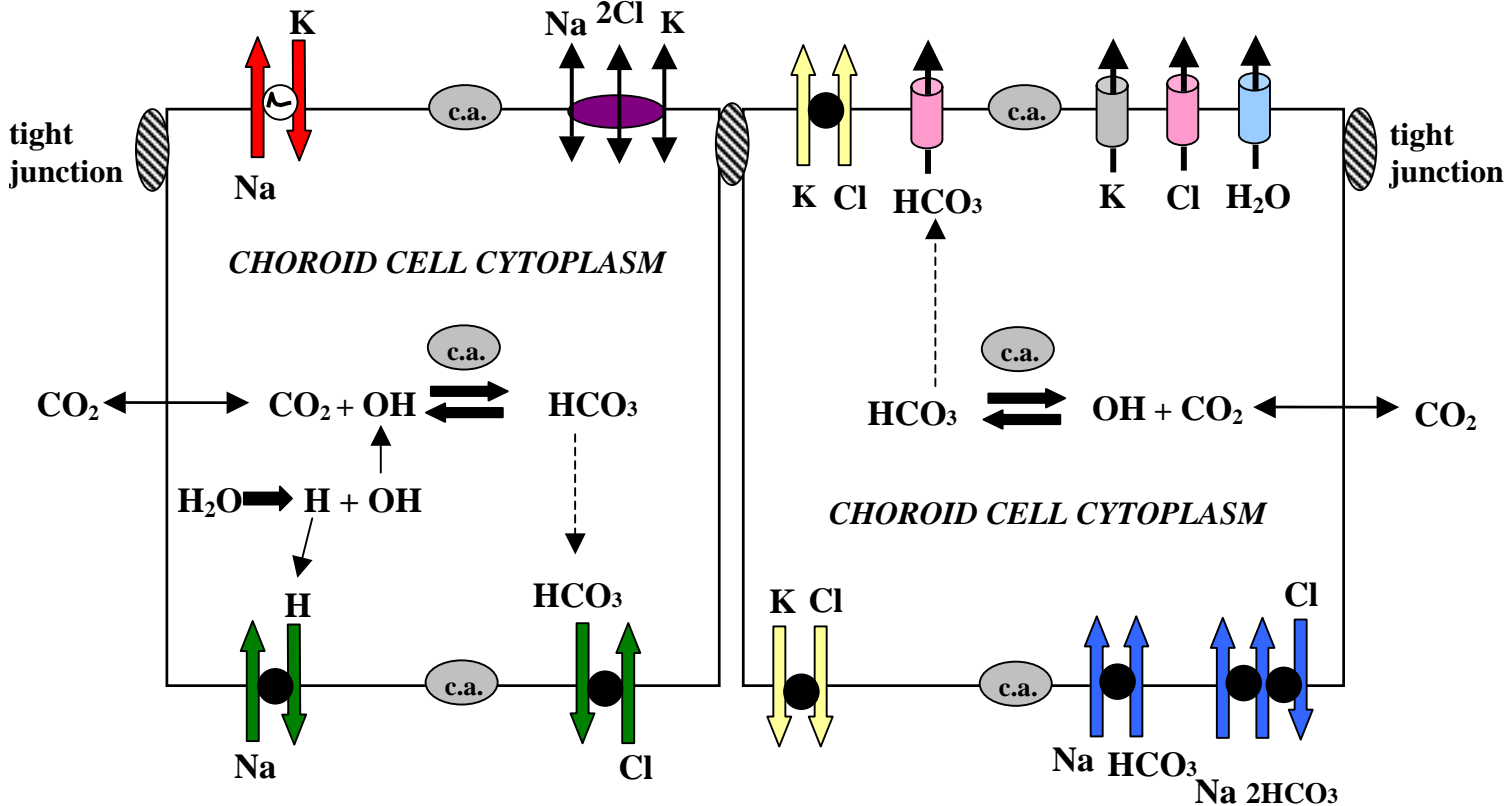

*(basolateral membrane)*

**INTERSTITIAL FLUID or PLASMA ULTRAFILTRATE**
